# Supplementary material for: Tunable emission color and mixed valence state via the modified activator site in the AlN-doped Sr3SiO5:Eu phosphor
Source: Royal Society of Chemistry journal article supplement (doi:10.1039/c6ra04387a), 2016-01-01
Supplement: c6ra04387a1.pdf [file c6ra04387a1.pdf]

## Electronic Supplementary Information (ESI)

### Tunable Emission Color and Mixed Valence State via the Modified Activator Site in AlN-Doped Sr<sub>3</sub>SiO<sub>5</sub>:Eu Phosphor

Wei Li,<sup>a</sup> Jin Wang,<sup>a</sup> Haoran Zhang,<sup>a</sup> Yingliang Liu,<sup>a,\*</sup> Bingfu Lei,<sup>a,\*</sup> Jianle Zhuang,<sup>a</sup>  
Jianghu Cui,<sup>a</sup> Mingying Peng<sup>b</sup> and Yue Zhu<sup>a</sup>

<sup>a</sup> Guangdong Provincial Engineering Technology Research Center for Optical Agriculture, College of Materials and Energy, South China Agricultural University, Guangzhou 510642, P. R. China

<sup>b</sup> The State Key Laboratory of Luminescent Materials and Devices, School of Materials Science and Engineering, South China University of Technology, Guangzhou 510640, P.R. China

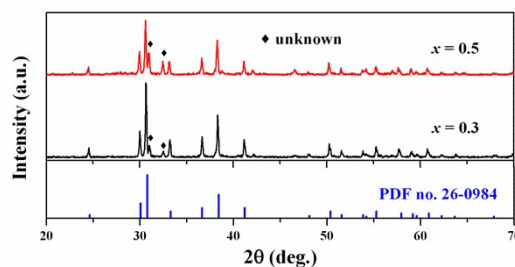

**Figure S1.** XRD patterns of Sr<sub>2.97</sub>Si<sub>1-x</sub>Al<sub>x</sub>O<sub>5-2x</sub>N<sub>x</sub>:0.03Eu ( $x = 0.3$  and  $0.5$ ), together with the standard data for Sr<sub>3</sub>SiO<sub>5</sub> as reference.

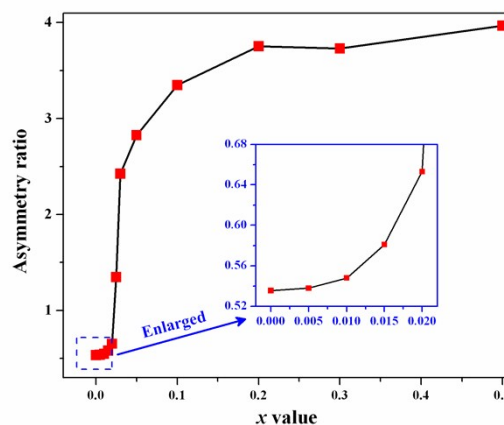

**Figure S2.** Asymmetry ratio of the emission intensities of Eu<sup>3+</sup> transitions of <sup>5</sup>D<sub>0</sub>→<sup>7</sup>F<sub>2</sub> and <sup>5</sup>D<sub>0</sub>→<sup>7</sup>F<sub>1</sub> as a function of  $x$  values.

\* Corresponding author: [tleibf@scau.edu.cn](mailto:tleibf@scau.edu.cn) (B. Lei).

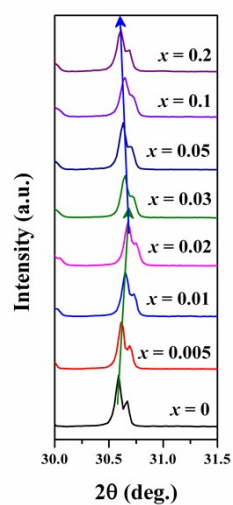

Figure S3. Detailed XRD patterns from  $30^\circ$  to  $31.5^\circ$  of  $\text{Sr}_{2.97}\text{Si}_{1-x}\text{Al}_x\text{O}_{5-2x}\text{N}_x:0.03\text{Eu}$  ( $x = 0-0.2$ ).

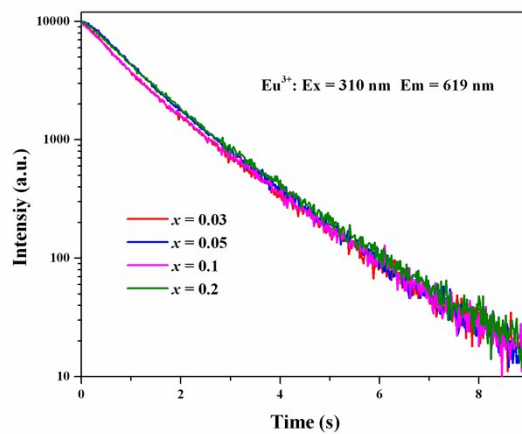

Figure S4. Decay curves ( $\lambda_{\text{ex}} = 310 \text{ nm}$ ,  $\lambda_{\text{em}} = 619 \text{ nm}$ ) of  $\text{Eu}^{3+}$  in  $\text{Sr}_{2.97}\text{Si}_{1-x}\text{Al}_x\text{O}_{5-2x}\text{N}_x:0.03\text{Eu}$  ( $x = 0.03, 0.05, 0.1$  and  $0.2$ ).

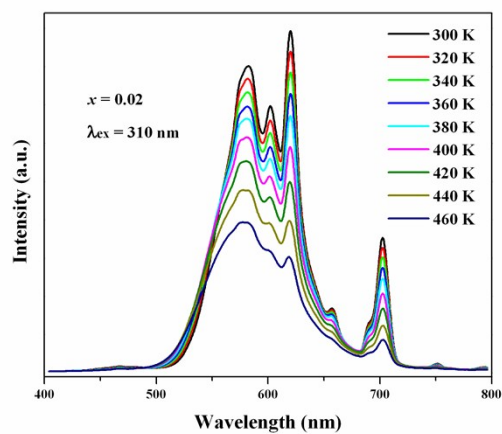

Figure S5. PL ( $\lambda_{\text{ex}} = 310 \text{ nm}$ ) spectra of  $\text{Sr}_{2.97}\text{Si}_{1-x}\text{Al}_x\text{O}_{5-2x}\text{N}_x:0.03\text{Eu}$  ( $x = 0.02$ ) under various temperatures (300-460 K).
